# Supplementary material for: A pH and salt dually responsive emulsion in the presence of amphiphilic macromolecules
Source: Royal Society of Chemistry journal article supplement (doi:10.1039/c7sm01760j), 2017-12-05
Supplement: c7sm01760j1.pdf [file c7sm01760j1.pdf]

### Supporting information

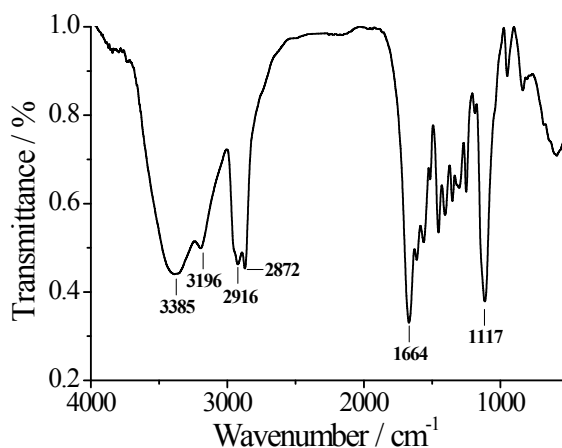

Figure S1. FTIR spectrum of amphiphilic macromolecule.

Fourier Transform infrared spectroscopy (FTIR) spectra were obtained with a Bruker Tensor-27 spectrometer at  $25.0 \pm 0.5^\circ\text{C}$ . A doublet adsorption peaks at around 3385 and  $3196\text{ cm}^{-1}$  appeared in Fig.S1, corresponding to primary amine residues; but they were in a shift to low wave number, probably because of the coupling between primary amine and tertiary amine residues<sup>[1]</sup>. A peak at around 2196 and  $2872\text{ cm}^{-1}$  was observed and attributed to  $\text{CH}_3$ - and  $-\text{CH}_2$ - stretching vibration, respectively. The intensity of the adsorption peak at  $\sim 1664\text{ cm}^{-1}$  was the characteristic peak of the  $\text{C}=\text{O}$  stretching vibration. The adsorption peak of  $-\text{C}-\text{O}-\text{C}-$  group was observed at  $\sim 1117\text{ cm}^{-1}$ .

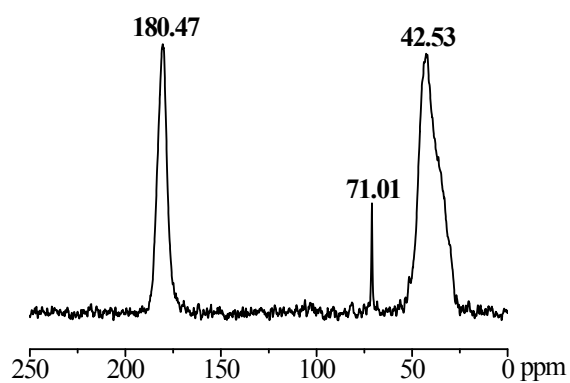

Figure S2. Solid-state  $^{13}\text{C}$  NMR of amphiphilic macromolecule.

Solid-state  $^{13}\text{C}$  NMR measurements were carried out at  $25.0 \pm 0.1$  °C on a Bruker Avance III spectrometer (400 MHz). From Fig.S2, the carbon chemical shift at  $\sim 180$  ppm was attributed to C=O group; a narrow shift at  $\sim 71$  ppm was assigned to the C-C group close to ether bond; the shift at around 42 ppm was attributed to alkyl group.

LLS spectrometer (ALV/DLS/SLS-5022F) with a multi- $\tau$  digital time correlator (ALV-5000) and a cylindrical 22 mW He-Ne laser ( $\lambda = 632.8$  nm) as the incident beam was used. In static LLS continuously measuring in the range of  $30\sim 80^\circ$ , we can obtain the weight-average molar mass ( $M_w$ ), and the z-average root-mean-square radius of gyration ( $\langle R_g^2 \rangle^{1/2}$  or written as  $\langle R_g \rangle$ ) of scattering objects in a dilute solution or dispersion from the angular dependence of the excess scattering intensity, known as Rayleigh ratio  $R_{vv}(q)$  and shown as eq 1:<sup>[2,3]</sup>

$$\frac{KC}{R_{vv}(q)} \approx \frac{1}{M_w} \left(1 + \frac{1}{3} \langle R_g^2 \rangle q^2\right) + 2A_2C \quad (1)$$

where  $K = 4\pi n^2 (dn/dc)^2 / (N_A \lambda_0^4)$  and  $q = (4\pi n / \lambda_0) \sin(\theta/2)$  with  $N_A$ ,  $dn/dc$  (approximately being 0.1 ml/g),  $n$ , and  $\lambda_0$  being the Avogadro number, the specific refractive index increment, the solvent refractive index, and the wavelength of the light in a vacuum, respectively.

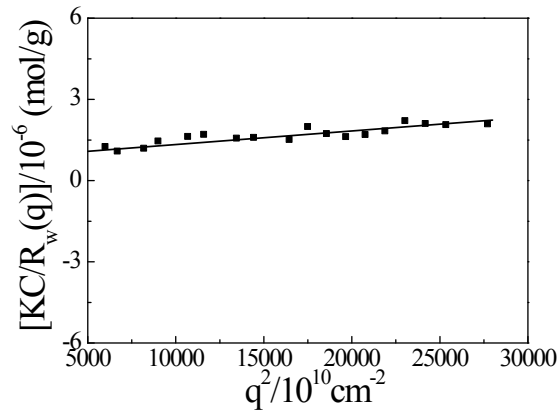

Figure S3. Scattering vector ( $q$ ) dependence of Rayleigh ratio  $R_{vv}(q)$  of amphiphilic macromolecule chains in water, where the macromolecule concentration is  $5.0 \times 10^{-6}$  g/mL and the relative error is no more than 5% for each data point.

In SLS study of our amphiphilic macromolecule, the solution was so dilute that the extrapolation of  $C \rightarrow 0$  is not necessary, and the second term  $2A_2C$  in eq 1 can be dropped.<sup>[2,3]</sup> The results show that  $M_w$  and  $\langle R_g \rangle$  of the amphiphilic macromolecule are  $1.01 \times 10^6$  g/mol and 113 nm, respectively.

X-ray photoelectron spectroscopy (XPS) was performed on Thermo Scientific ESCALab 250Xi using 200 W monochromated Al K $\alpha$  radiation. The 500  $\mu$ m X-ray spot was used for XPS analysis. The base pressure in the analysis chamber was about  $3 \times 10^{-10}$  mbar. Typically, the hydrocarbon C 1s line at 284.8 eV from adventitious carbon is used for energy referencing.

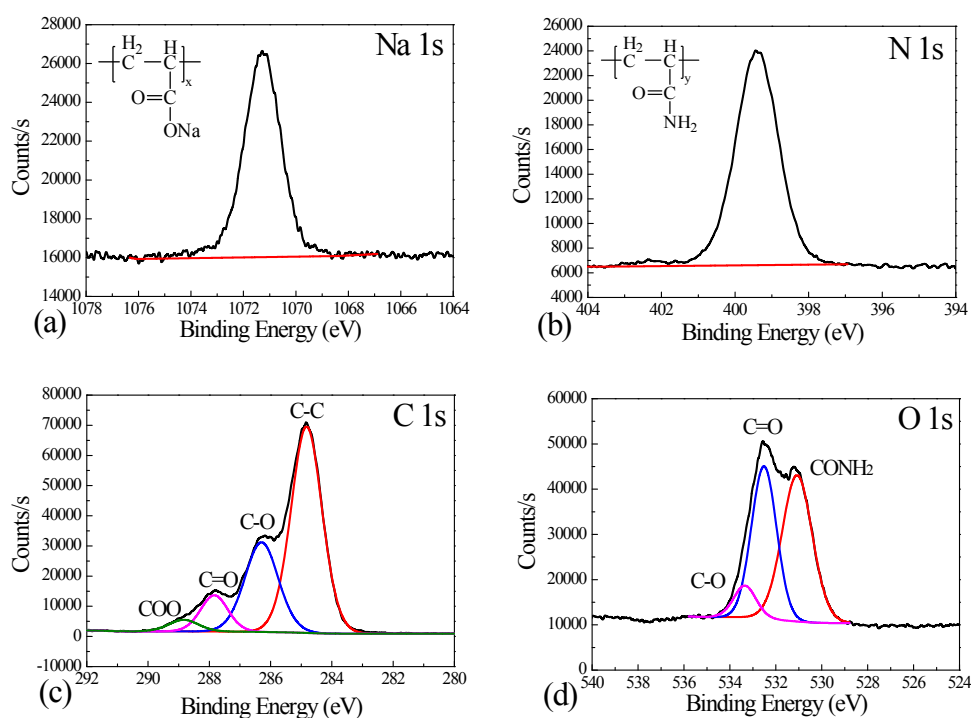

Figure S4. XPS Na 1s, N 1s, C 1s, and O 1s spectra of amphiphilic macromolecule. From X-ray photoelectron spectroscopy (XPS) results (Figure 2), the peaks of Na 1s and N 1s at around 1071.3 eV and 399.4 eV can be observed, respectively. 4 peaks are fitted up to the data set from Figure 2c, in which C 1s peaks at around 284.8 eV, 286.3 eV, 287.8 eV, and 288.8 eV are observed, assigned to C–C, C–O, C=O, and COO, respectively. O 1s peaks at around 531.7 eV, 532.5 eV, and 533.4 eV can be observed, which are assigned to C=ONH<sub>2</sub>, C=O, and C–O. XPS results afford the ability to quantify the fraction of each block<sup>[4,5]</sup>, such as the fraction of ionizable group being approximately 23.1 %.

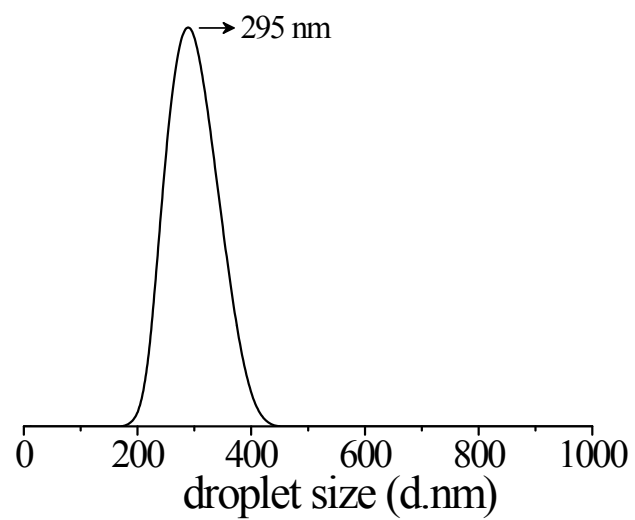

Figure S5. Distribution of volume average droplet diameter of the emulsion containing a fixed amount of macromolecule (1000 mg/L) in the aqueous phase.

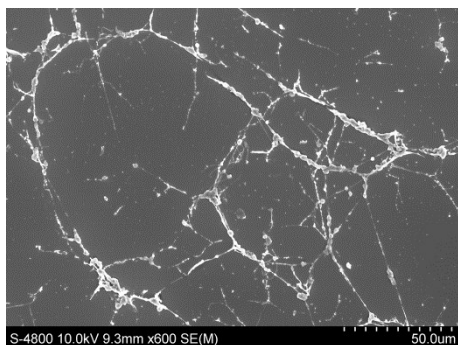

(a) pH 2

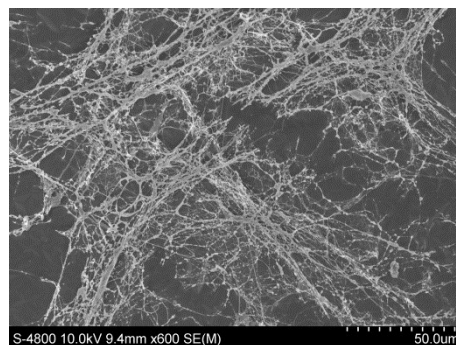

(b) pH 6

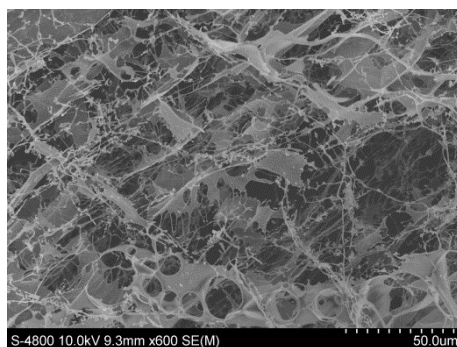

(c) pH 10

Figure S6. SEM images of amphiphilic macromolecule systems at pH 2 (a), pH 6 (b), and pH 10 (c).

The macromolecule aqueous solutions at different pH values were prepared with the vacuum sublimation freezing drying technique<sup>[6]</sup>, and the aggregation behaviors of the macromolecules were investigated by using a Hitachi S-4800 scanning electron microscope.

Table S1. Zeta potential of emulsions at different pH values and salinities.

| emulsions at different pH |          |           |           |         |           |
|---------------------------|----------|-----------|-----------|---------|-----------|
|                           | pH 2     | pH 4      | pH 6      | pH 8    | pH 10     |
| zeta potential (mV)       | 2.6±0.72 | -4.1±0.23 | -12.9±0.4 | -15±4.8 | -11.7±2.2 |

  

| emulsions at different salinities (mg/L) |           |           |           |           |           |          |
|------------------------------------------|-----------|-----------|-----------|-----------|-----------|----------|
|                                          | 0         | 25        | 37.5      | 50        | 75        | 100      |
| zeta potential (mV)                      | -28.4±2.8 | -21.7±1.0 | -19.5±3.2 | -16.1±0.8 | -14.1±3.1 | 4.9±0.18 |

Table S2. Interfacial tension of different systems.

| emulsions at different pH                         |                 |                 |                  |                  |                 |
|---------------------------------------------------|-----------------|-----------------|------------------|------------------|-----------------|
|                                                   | pH 2            | pH 4            | pH 6             | pH 8             | pH 10           |
| interfacial tension (mN/m)                        | $8.54 \pm 0.11$ | $7.67 \pm 0.25$ | $5.24 \pm 0.12$  | $4.34 \pm 0.28$  | $3.91 \pm 0.16$ |
| emulsions at pH 5 and different salinities (mg/L) |                 |                 |                  |                  |                 |
|                                                   | 0               | 25              | 37.5             | 50               |                 |
| interfacial tension (mN/m)                        | $6.84 \pm 0.11$ | $8.73 \pm 0.36$ | $12.33 \pm 0.42$ | $12.91 \pm 0.13$ |                 |



## REFERENCES

- [1] Ochi, M.; Takahashi, R., Phase Structure and Thermomechanical Properties of Primary and Tertiary Amine - Cured Epoxy/Silica Hybrids. *Journal of Polymer Science Part B Polymer Physics* **2001**, *39*, 1071-1084.
- [2] Wu, C.; Zhou, S., Laser Light Scattering Study of the Phase Transition of Poly(N-isopropylacrylamide) in Water. 1. Single Chain. *Macromolecules* **1995**, *28*, 8381-8387.
- [3] Qingwei Zhang; Ye, J.; Yijie Lu; Ting Nie; Dinghai Xie; Qiliang Song; Hongwei Chen; Guangzhao Zhang; Tang, Y.; Wu, Chi, Synthesis, Folding, and Association of Long Multiblock (PEO<sub>23</sub>-b-PNIPAM<sub>124</sub>)<sub>750</sub> Chains in Aqueous Solutions. *Macromolecules* **2008**, *41*, 2228-2234.
- [4] Derek Patton, Wolfgang Knoll, Rigoberto C. Advincula, Polymer Loops vs. Brushes on Surfaces: Adsorption, Kinetics, Viscoelastic Behavior of  $\alpha,\omega$ -Thiol Telechelics on Gold. *Macromolecular Chemistry and Physics* **2011**, *212*, 485-497.
- [5] TD Thomas, X-Ray Photoelectron Spectroscopy of Simple Hydrocarbons. *Journal of Chemical Physics* **1970**, *52*, 1373-1380.
- [6] Zhao, Y.; Zhou, J.; Xu, X.; Liu, W.; Zhang, J.; Fan, M.; Wang, J., Synthesis and Characterization of a Series of Modified Polyacrylamide. *Colloid & Polymer Science* **2009**, *287*, 237-241.
